# Supplementary material for: Synergies in antimicrobial treatment by a levofloxacin-loaded halloysite and gold nanoparticles with a conjugation to a cell-penetrating peptide
Source: Royal Society of Chemistry journal article supplement (doi:10.1039/d2na00431c), 2022-01-01

## Synergies in Antimicrobial Treatment by a Levofloxacin-Loaded Halloysite and Gold Nanoparticles with a Conjugation to a Cell-Penetrating Peptide

Reza Taheri-Ledari<sup>1,\*</sup>, Mohammad Reza Ahghari<sup>1</sup>, Fatemeh Ansari<sup>1</sup>, Mohadeseh Forouzandeh-Malati<sup>1</sup>, Seyedeh Shadi Mirmohammadi<sup>1</sup>, Simindokht Zarei-Shokat<sup>1</sup>, Sorour Ramezanzpour<sup>2</sup>, Wenjie Zhang<sup>3</sup>, Ye Tian<sup>\*4</sup> and Ali Maleki<sup>\*1</sup>

<sup>1</sup> Catalysts and Organic Synthesis Research Laboratory, Department of Chemistry, Iran University of Science and Technology, Tehran 16846-13114, Iran.

<sup>2</sup> Department of Chemistry, K. N. Toosi University of Technology, P.O. Box 15875-4416, Tehran, Iran.

<sup>3</sup> Department of Nuclear Medicine, West China Hospital, Sichuan University, No. 37, Guoxue Alley, Chengdu 610041, Sichuan Province, P.R. China.

<sup>4</sup> State Key Laboratory of Oral Diseases & National Clinical Research Center for Oral Diseases, Department of Orthodontics, West China Hospital of Stomatology, Sichuan University, No.14, 3rd section of South Renmin Road, Chengdu 610041, P.R. China. E-mail: [tianye@scu.edu.cn](mailto:tianye@scu.edu.cn).

\*Corresponding authors: (Reza Taheri-Ledari) E-mail: [Rezataheri13661206@gmail.com](mailto:Rezataheri13661206@gmail.com), [R\\_Taheri94@alumni.iust.ac.ir](mailto:R_Taheri94@alumni.iust.ac.ir); (Ye Tian) E-mail: [tianye@scu.edu.cn](mailto:tianye@scu.edu.cn); (Ali Maleki) E-mail: [maleki@iust.ac.ir](mailto:maleki@iust.ac.ir); Fax: +98-21-73021584; Tel: +98-21-73228313.

## Table of Content

| Content                                                                                             | Page      |
|-----------------------------------------------------------------------------------------------------|-----------|
| <b>Figure S1.</b> Figure S1. LC-MS spectrum and chemical structure of the synthesized CPP sequence. | <b>S2</b> |
| Calculation of the released lvx and drug content of lvx@HNT/Au-CPP nano-cargo                       | <b>S3</b> |
| <b>Figure S2.</b> Digital photos of the colony-count disks related to the controls.                 | <b>S4</b> |

# Supporting Information

**Figure S1.** LC-MS spectrum and chemical structure of the synthesized CPP sequence.

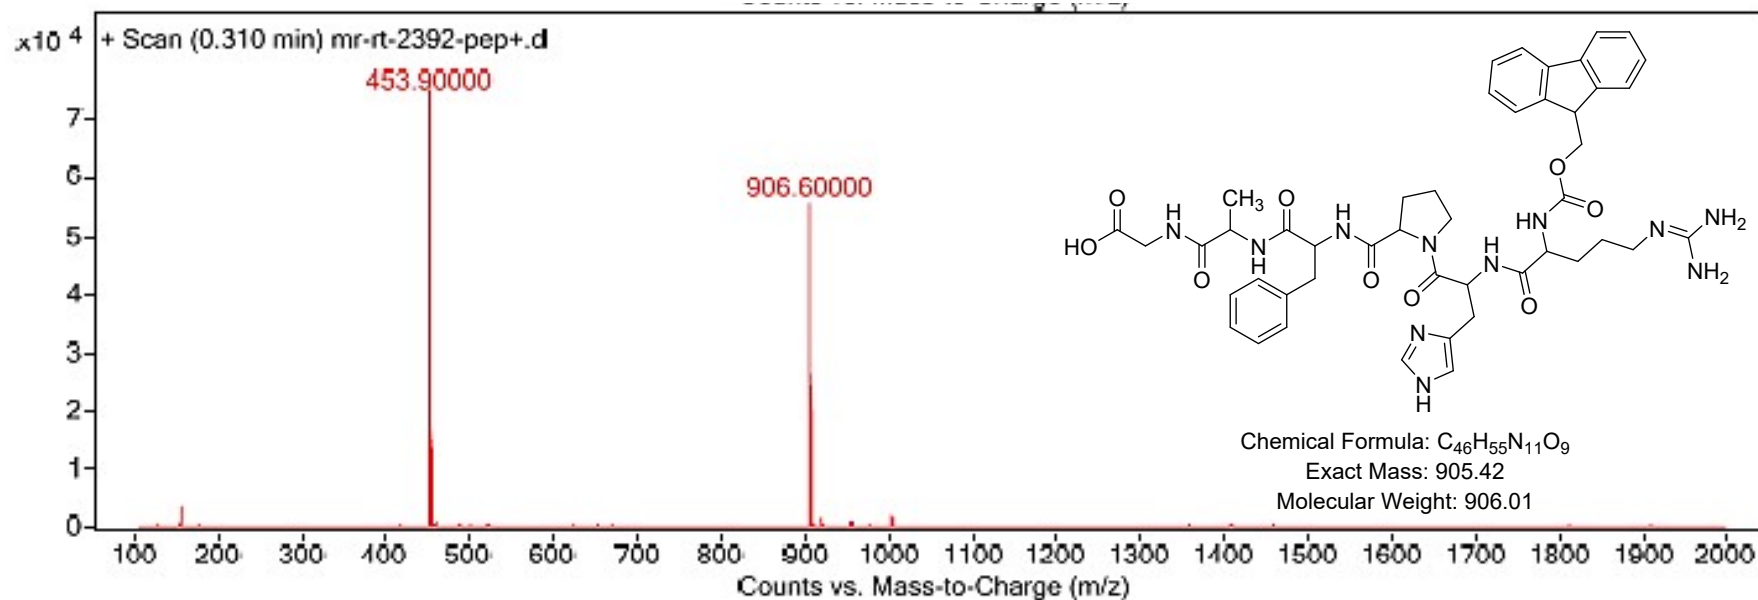

## LC-MS result:

ESI technique:  $[M+1]^+ = m/z$  906.60000 and  $[M+2H]^{2+}/2 = m/z$  453.90000.

# Supporting Information

## Calculation of the released lvx and drug content of lvx@HNT/Au–CPP nano-cargo

$$X = \frac{Y - 0.1227}{0.2941} \times 100 \quad (\text{Eq. 1})$$

Entry 4 (pH = 4.6/LSPR conditions): Y = 0.593 (the highest value of the UV-Vis absorbance activity in release profile)

X = 159.91 ~ 160 ppm (the concentration of the released lvx, obtained from Eq. 1)

160 ppm = 0.16 mg/mL = 1.6 mg in 10 mL (since 10 mg of lvx@HNT/Au–CPP was dispersed in 10 mL buffer medium)

$$\frac{1.6 \text{ mg (released lvx in 10 mL buffer)}}{10 \text{ mg (initial amount of lvx@HNT/Au–CPP)}} \times 100 = 16 \text{ wt\%}$$

It means that ca. 16.0 wt% of the prepared lvx@HNT/Au–CPP nano-cargo is formed by the loaded lvx.

In the same way;

Entry 1 (pH = 6.8/37 °C): Y = 0.522 → X = 135.77 ppm → 0.13577 mg/mL → 1.3577 mg/ 10 mL → 1.357 mg/ 10 mg × 100 = 13.57 %

⇒ 13.57 % / 16.0 % × 100 = **84.5%**

Entry 2 (pH = 8.0/37 °C): Y = 0.540 → X = 141.89 ppm → 0.1418 mg/mL → 1.418 mg/ 10 mL → 1.418 mg/ 10 mg × 100 = 14.18 %

⇒ 14.18 % / 16.0 % × 100 = **88.6%**

Entry 2 (pH = 4.6/37 °C): Y = 0.542 → X = 142.57 ppm → 0.1425mg/mL → 1.425 mg/ 10 mL → 1.425 mg/ 10 mg × 100 = 14.25 %

⇒ 14.25 % / 16.0 % × 100 = **89.0%**

# Supporting Information

Figure S2. Digital photos of the colony-count disks related to the controls.

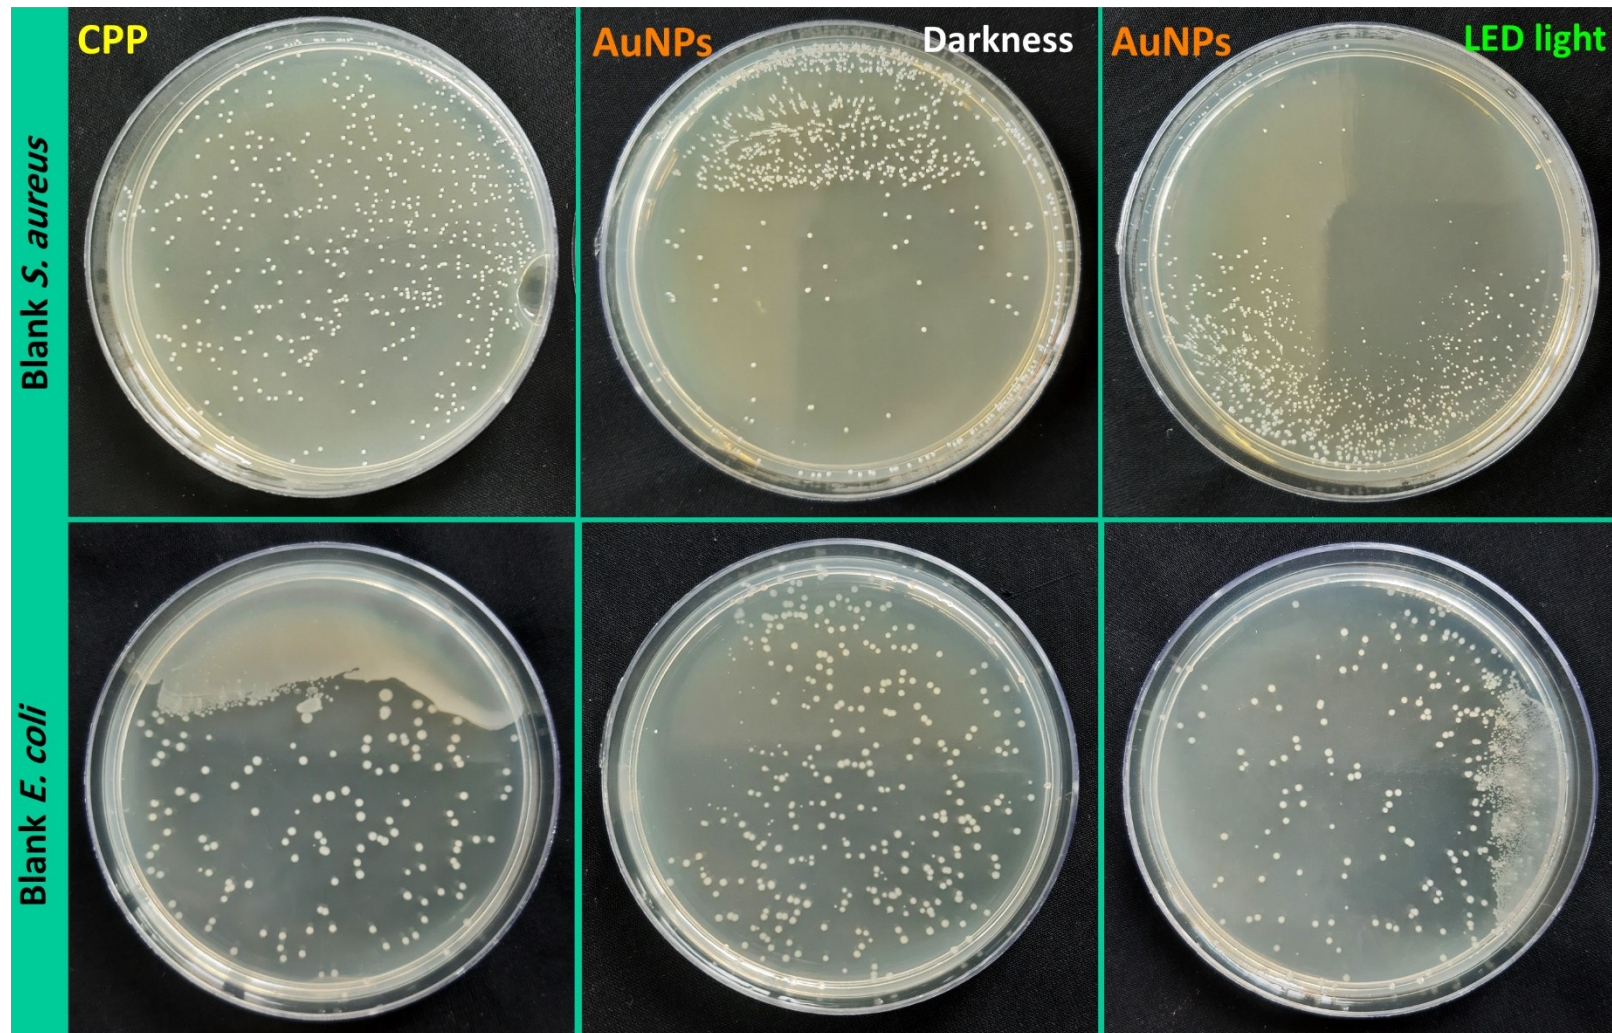

Supplement: d2na00431c1.pdf [file d2na00431c1.pdf]
