# Supplementary figures and images for: Synergies in antimicrobial treatment by a levofloxacin-loaded halloysite and gold nanoparticles with a conjugation to a cell-penetrating peptide
Source: Royal Society of Chemistry journal article supplement (doi:10.1039/d2na00431c), 2022-01-01

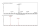

Supplement: d2na00431c2.pdf [file d2na00431c2.pdf]

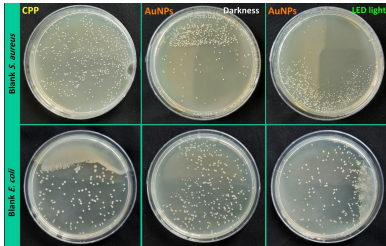

Supplement: d2na00431c3.pdf [file d2na00431c3.pdf]
